# Supplementary material
Source: PubMed Central journal article supplement (PMC6014545)
Supplement: DC171896SupplementaryData.pdf [file DC171896SupplementaryData.pdf]

SUPPLEMENTARY DATA

**Supplementary Table 1.** Slopes of neurocognitive function by age splines and metabolic syndrome status.

|                                      | <b>Slope</b> | <b>SE</b> | <b>P-value</b> |
|--------------------------------------|--------------|-----------|----------------|
| <b>SEVLT-Sum</b>                     |              |           |                |
| <b>Age &lt;65</b>                    |              |           |                |
| No MetS                              | -0.0122      | 0.0031    | 0.000          |
| MetS                                 | -0.0244      | 0.0028    | 0.000          |
| <b>Age 65+</b>                       |              |           |                |
| No MetS                              | -0.0670      | 0.0156    | 0.000          |
| MetS                                 | -0.0292      | 0.0123    | 0.018          |
| <b>SEVLT-Recall</b>                  |              |           |                |
| <b>Age &lt;65</b>                    |              |           |                |
| No MetS                              | -0.0126      | 0.0030    | 0.000          |
| MetS                                 | -0.0258      | 0.0030    | 0.000          |
| <b>Age 65+</b>                       |              |           |                |
| No MetS                              | -0.0432      | 0.0152    | 0.005          |
| MetS                                 | -0.0189      | 0.0133    | 0.156          |
| <b>WF</b>                            |              |           |                |
| <b>Age &lt;65</b>                    |              |           |                |
| No MetS                              | -0.0018      | 0.0033    | 0.572          |
| MetS                                 | -0.0033      | 0.0033    | 0.306          |
| <b>Age 65+</b>                       |              |           |                |
| No MetS                              | -0.0026      | 0.0207    | 0.898          |
| MetS                                 | -0.0196      | 0.0151    | 0.197          |
| <b>DSS</b>                           |              |           |                |
| <b>Age &lt;65</b>                    |              |           |                |
| No MetS                              | -0.0295      | 0.0029    | 0.000          |
| MetS                                 | -0.0340      | 0.0026    | 0.000          |
| <b>Age 65+</b>                       |              |           |                |
| No MetS                              | -0.0301      | 0.0133    | 0.024          |
| MetS                                 | -0.0159      | 0.0094    | 0.090          |
| <b>Global Cognition</b>              |              |           |                |
| <b>Age &lt;65</b>                    |              |           |                |
| No MetS                              | -0.0150      | 0.0030    | 0.000          |
| MetS                                 | -0.0278      | 0.0028    | 0.000          |
| <b>Age 65+</b>                       |              |           |                |
| No MetS                              | -0.0620      | 0.0152    | 0.000          |
| MetS                                 | -0.0266      | 0.0128    | 0.039          |
| <b>Low Mental Status (SIS&lt;=4)</b> |              |           |                |
| <b>Age &lt;65</b>                    |              |           |                |
| No MetS                              | 0.0044       | 0.0015    | 0.003          |

SUPPLEMENTARY DATA

|                |                |        |        |       |
|----------------|----------------|--------|--------|-------|
|                | <b>MetS</b>    | 0.0044 | 0.0015 | 0.003 |
| <b>Age 65+</b> |                |        |        |       |
|                | <b>No MetS</b> | 0.0223 | 0.0079 | 0.005 |
|                | <b>MetS</b>    | 0.0035 | 0.0047 | 0.463 |

Estimates based on survey generalized linear regression models assuming a Gaussian distribution for continuous outcomes (z-scores) and logistic distribution for low mental status.

MetS: Metabolic Syndrome defined using the International Diabetes Federation specifications.

SEVLT= Spanish English Verbal Learning Test; WF=Word Fluency; DSS=Digit Symbol Substitution; SIS=Six Item Screener

Models include sex, age splines (at age 65)\*MetS interaction, education, Hispanic/Latino background, and Center for Epidemiologic Studies Depression-10 scale.

SUPPLEMENTARY DATA

**Supplementary Table 2.** Association of metabolic syndrome with neurocognitive function among Hispanic/Latinos of diverse backgrounds by inflammation (High-sensitivity C-Reactive Protein) groups.

|                          |                 | CRP<3↑                      | CRP 3+↑            |
|--------------------------|-----------------|-----------------------------|--------------------|
|                          |                 | b/se                        | b/se               |
| <b>SEVLT Sum</b>         | <b>MetS</b>     | 0.65** [0.22]               | 0.44[0.24]         |
|                          | <b>Age</b>      | -0.02***[0.00]              | -0.02***[0.00]     |
|                          | <b>MetS*Age</b> | -0.01** [0.00]              | -0.01* [0.00]      |
| <b>SEVLT Recall</b>      | <b>MetS</b>     | 0.67***[0.19]               | 0.55* [0.25]       |
|                          | <b>Age</b>      | -0.02***[0.00]              | -0.02***[0.00]     |
|                          | <b>MetS*Age</b> | -0.01***[0.00]              | -0.01* [0.00]      |
| <b>Word Fluency</b>      | <b>MetS</b>     | -0.11** [0.04]              | -0.03[0.04]        |
|                          | <b>Age</b>      | 0[0.00]                     | 0[0.00]            |
|                          | <b>MetS*Age</b> | n/a                         | n/a                |
| <b>Digit Symbol Test</b> | <b>MetS</b>     | -0.09***[0.03]              | -0.09** [0.03]     |
|                          | <b>Age</b>      | -0.03***[0.00]              | -0.03***[0.00]     |
|                          | <b>MetS*Age</b> | n/a                         | n/a                |
| <b>Global Cognition</b>  | <b>MetS</b>     | 0.62** [0.20]               | 0.42[0.23]         |
|                          | <b>Age</b>      | -0.02***[0.00]              | -0.02***[0.00]     |
|                          | <b>MetS*Age</b> | -0.01** [0.00]              | -0.01[0.00]        |
|                          |                 | <b>OR[95%CI]</b>            | <b>OR[95%CI]</b>   |
| <b>SIS&lt;=4</b>         | <b>MetS</b>     | 0.97[0.78;1.22]             | 1.23[0.93;1.63]    |
|                          | <b>Age</b>      | 1.05***[1.03;1.07]          | 1.05***[1.03;1.07] |
|                          | <b>MetS*Age</b> | n/a                         | n/a                |
|                          |                 | <b>Interaction Effect↑↑</b> | <b>F-Test</b>      |
| <b>Global Cognition</b>  | CRP*MetS*Age    | F( 1, 644) = 0.23           | Prob > F = 0.6302  |
| <b>SEVLT Sum</b>         | CRP*MetS*Age    | F( 1, 644) = 0.15           | Prob > F = 0.6958  |
| <b>SEVLT Recall</b>      | CRP*MetS*Age    | F( 1, 644) = 0.09           | Prob > F = 0.7707  |
| <b>Word Fluency</b>      | CRP*MetS*Age    | F( 1, 644) = 3.09           | Prob > F = 0.0791  |
| <b>Digit Symbol Test</b> | CRP*MetS*Age    | F( 1, 644) = 0.12           | Prob > F = 0.7319  |
| <b>SIS&lt;=4</b>         | CRP*MetS*Age    | F( 1, 644) = 0.18           | Prob > F = 0.6677  |

Estimates based on survey generalized linear regression models assuming a Gaussian distribution for continuous outcomes and logistic distribution for SIS.

MetS: Metabolic Syndrome defined using the International Diabetes Federation specifications.

CRP: High-sensitivity C-Reactive Protein.

SIS: Six Item Screener

↑Adjusted for sex, age\*MetS interaction, education, Hispanic/Latino background, and Center for Epidemiologic Studies Depression-10 scale.

↑↑ Tests for differential association of metabolic syndrome with neurocognitive function among Hispanic/Latinos of diverse backgrounds by inflammation (high-sensitivity C-reactive protein) groups. Based on models estimated with full interactions between CRP groups and sex, age\*MetS interaction, education, Hispanic/Latino background, and Center for Epidemiologic Studies Depression-10 scale.

SUPPLEMENTARY DATA

\*\*\* $p < 0.001$ ; \*\* $p < 0.01$ ; \* $p < 0.05$

**Supplementary Figure 1.** Inclusion criteria and analytic sample size.

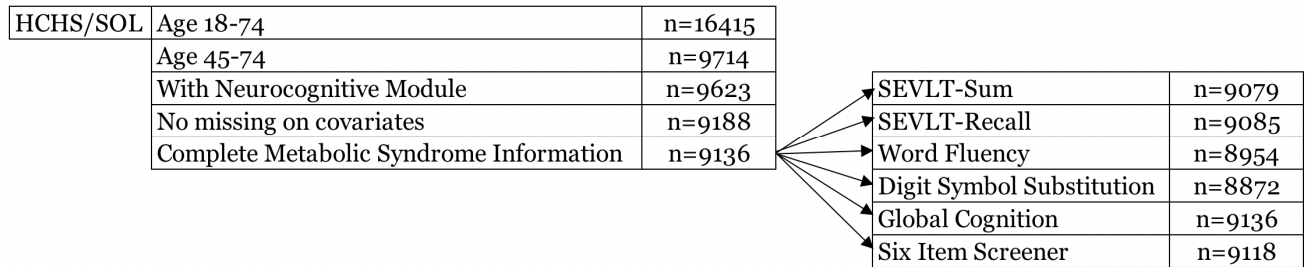

SUPPLEMENTARY DATA

**Supplementary Figure 2.** Estimated marginal means (probabilities) of neurocognitive function over age by metabolic syndrome status stratified by inflammation (high sensitivity C-reactive protein). Estimates are based on survey generalized linear regression models assuming a Gaussian distribution for continuous outcomes (z-scores) and logistic distribution for low mental status.

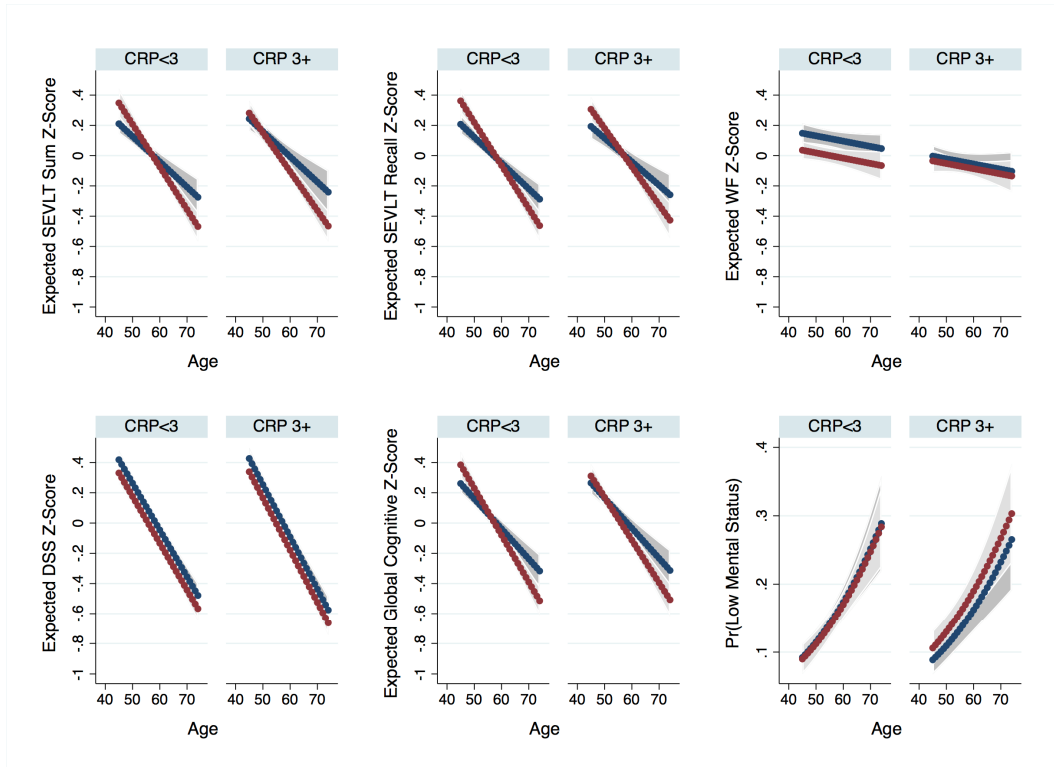

SEVL T= Spanish English Verbal Learning Test; WF=Word Fluency; DSS=Digit Symbol Substitution; SIS=Six Item Screener

MetS: Metabolic Syndrome defined using the International Diabetes Federation (IDF) specifications.

CRP: High-sensitivity C-Reactive Protein.

Model includes sex, age\*MetS interaction, education, Hispanic/Latino background, and Center for Epidemiologic Studies Depression-10 scale.
